1 **Mobility and infectiousness in the spatial spread of an emerging fungal pathogen**

2

3 Kate E. Langwig<sup>1\*</sup>, J. Paul White<sup>2</sup>, Katy L. Parise<sup>3</sup>, Heather M. Kaarakka<sup>2</sup>, Jennifer A.

4 Redell<sup>2</sup>, John E. DePue<sup>4</sup>, William H. Scullon<sup>5</sup>, Jeffrey T. Foster<sup>3</sup>, A. Marm Kilpatrick<sup>6,Ψ</sup>,

5 Joseph R. Hoyt<sup>1,Ψ</sup>

6

7 **Affiliations:**

8 <sup>1</sup> *Department of Biological Sciences, Virginia Polytechnic Institute, Blacksburg, VA,*

9 *24060 USA*

10 <sup>2</sup> *Wisconsin Department of Natural Resources, Madison, WI, 53703 USA*

11 <sup>3</sup> *Pathogen and Microbiome Institute, Northern Arizona University, Flagstaff, AZ 86011,*

12 *USA*

13 <sup>4</sup> *Michigan Department of Natural Resources, Baraga, MI 49870, USA*

14 <sup>5</sup> *Michigan Department of Natural Resources, Norway, MI 49908, USA*

15 <sup>6</sup> *Department of Ecology and Evolutionary Biology, University of California, Santa Cruz,*

16 *CA 95064 USA*

17

18 \*Corresponding author: [klangwig@gmail.com](mailto:klangwig@gmail.com); <sup>Ψ</sup>these authors contributed equally

19

20 **Key Words** migration; infectious disease, *Pseudogymnoascus destructans*, pathogen

21 seasonality; white-nose syndrome

22

## 23 **Abstract**

- 24 1. Emerging infectious diseases can have devastating effects on host communities,  
25 causing population collapse and species extinctions. The timing of novel pathogen  
26 arrival into naïve species communities can have consequential effects that shape  
27 the trajectory of epidemics through populations. Pathogen introductions are often  
28 presumed to occur when hosts are highly mobile. However, spread patterns can be  
29 influenced by a multitude of other factors including host body condition and  
30 infectiousness.
- 31 2. White-nose syndrome (WNS) is a seasonal emerging infectious disease of bats,  
32 which is caused by the fungal pathogen *Pseudogymnoascus destructans*. Within-  
33 site transmission of *P. destructans* primarily occurs over winter, however the  
34 influence of bat mobility and infectiousness on the seasonal timing of pathogen  
35 spread to new populations is unknown. We combined data on host population  
36 dynamics and pathogen transmission from 22 bat communities to investigate the  
37 timing of pathogen arrival and the consequences of varying pathogen arrival times  
38 on disease impacts.
- 39 3. We found that midwinter arrival of the fungus predominated spread patterns,  
40 suggesting that bats were most likely to spread *P. destructans* when they are  
41 highly infectious, but have reduced mobility. In communities where *P.*  
42 *destructans* was detected in early winter, one species suffered higher fungal  
43 burdens and experienced more severe declines than at sites where the pathogen  
44 was detected later in the winter, suggesting that the timing of pathogen  
45 introduction had consequential effects for some bat communities. We also found

46 evidence of source-sink population dynamics over winter, suggesting some  
47 movement among sites occurs during hibernation, even though bats at northern  
48 latitudes were thought to be fairly immobile during this period. Winter emergence  
49 behavior symptomatic of white-nose syndrome may further exacerbate these  
50 winter bat movements to uninfected areas.

514. Our results suggest that low infectiousness during host migration may have  
52 reduced the rate of expansion of this deadly pathogen, and that elevated  
53 infectiousness during winter plays a key role in seasonal transmission.

54 Furthermore, our results highlight the importance of both accurate estimation of  
55 the timing of pathogen spread and the consequences of varying arrival times to  
56 prevent and mitigate the effects of infectious diseases.

57

## 58 **1. Introduction:**

59 The seasonality of pathogen spread is important for understanding, predicting, and  
60 controlling disease outbreaks. Pathogens infecting highly mobile hosts often have rapid  
61 rates of spread (Conner & Miller 2004; Altizer *et al.* 2006; Altizer, Bartel & Han 2011;  
62 Dalziel, Pourbohloul & Ellner 2013). However, key tradeoffs exist between mobility and  
63 disease, which can affect the likelihood that hosts spread pathogens during periods of  
64 high mobility (Kiesecker *et al.* 1999; Norris & Evans 2000; Wendland *et al.* 2010;  
65 Shakhar & Shakhar 2015). For example, migration can affect host body condition and  
66 immune status which could increase host susceptibility to infection (Altizer, Bartel &  
67 Han 2011). However, once a highly mobile host becomes infected, behavioral responses,  
68 such as sickness behavior, are likely to decrease mobility (Van Gils *et al.* 2007;

69 Bouwman & Hawley 2010). Pathogen spread should therefore be most likely to occur  
70 when hosts are both highly infectious and mobile, but given tradeoffs caused by sickness  
71 behavior, peak mobility and infectiousness may not temporally align (Shakhar & Shakhar  
72 2015). Understanding the relative importance of these factors in the seasonal timing of  
73 pathogen spread is critical because varying pathogen arrival times can have consequential  
74 effects on hosts that shape the trajectory of epidemics (Dalziel *et al.* 2018).

75 White-nose syndrome (WNS) is an annual seasonal epidemic that occurs in bat  
76 communities during winter (Langwig *et al.* 2015a; Hoyt *et al.* 2020a). The fungus that  
77 causes WNS, *Pseudogymnoascus destructans*, is psychrophilic and grows only at cool  
78 temperatures (1–20°C) (Verant *et al.* 2012) which restricts fungal replication and  
79 infection into bats' epidermal tissue to periods when bats are in torpor (e.g. cool their  
80 body temperatures <20°C) (Meteyer *et al.* 2009; Langwig *et al.* 2015a; Langwig *et al.*  
81 2016). White-nose syndrome disrupts bat physiology during hibernation, causing  
82 increased arousals that result in bats prematurely burning through fat stores before the  
83 end of winter (Lorch *et al.* 2011; Reeder *et al.* 2012; Warnecke *et al.* 2012; Warnecke *et*  
84 *al.* 2013; Verant *et al.* 2014). The spread of *P. destructans* has resulted in dramatic  
85 declines in bat communities across North America, and threatens several species with  
86 extinction (Frick *et al.* 2010; Langwig *et al.* 2012; Frick *et al.* 2015; Langwig *et al.*  
87 2016). Seasonal changes in host behavior and physiology paired with seasonal  
88 differences in pathogen growth may influence the timing of pathogen spread to new  
89 communities.

90 The seasonal timing of *P. destructans* spread among sites is unknown but may  
91 occur during autumn when bats are highly mobile during mating and move among caves

92 and mines (Davis & Hitchcock 1965; Cope & Humphrey 1977; Thomas, Fenton &  
93 Barclay 1979; Glover & Altringham 2008), which are known reservoirs of the fungus  
94 (Hoyt *et al.* 2020a). Autumn swarm behavior is an important source of gene flow when  
95 individuals move large distances between otherwise disconnected populations and  
96 contact among mating individuals could lead to pathogen transmission (Veith *et al.* 2004;  
97 Arnold 2007; Glover & Altringham 2008; Rossiter *et al.* 2012; Wilder, Kunz & Sorenson  
98 2015). However, the spread of WNS has occurred relatively slowly compared with other  
99 disease systems with similarly mobile hosts. For example, WNS and West Nile virus  
100 were both introduced to New York, USA, but in 5 years West Nile virus had reached  
101 California whereas WNS spanned less than half of eastern North America (Kilpatrick *et*  
102 *al.* 2006; Kilpatrick, LaDeau & Marra 2007). In addition, *P. destructans* is less prevalent  
103 on bats during autumn, and infected individuals typically have reduced infection levels  
104 (i.e. 100–1000-fold lower than in midwinter; (Langwig *et al.* 2015a), Figure 1),  
105 suggesting that spread may occur outside of the highly mobile autumn period. If  
106 infectiousness is more important than mobility in *P. destructans* spread among sites, then  
107 pathogen introduction to new communities could occur during winter when fungal loads  
108 on bats are highest (Langwig *et al.* 2015a). However, most species are thought to be  
109 highly philopatric to sites and relatively sedentary during winter, particularly at northern  
110 latitudes where temperatures fall well below freezing (Davis & Hitchcock 1965; Davis  
111 1970; Fenton & Barclay 1980; Fujita & Kunz 1984; Caceres & Barclay 2000). Therefore,  
112 further investigation is needed to disentangle the importance of host mobility and  
113 infectiousness in the spread of *P. destructans*.

114 We investigated the timing of arrival of *P. destructans* into 22 hibernating bat  
115 communities in the Midwestern U.S. We hypothesized that pathogen invasion would be  
116 more likely to occur during winter when bats are less mobile but highly infectious,  
117 resulting in the first detections of *P. destructans* at each site occurring in late, rather than  
118 early winter. Given the potential importance of seasonally varying arrival times on  
119 disease dynamics, we also assessed the influence of timing of *P. destructans*  
120 introductions on disease severity, hypothesizing that earlier introductions of *P.*  
121 *destructans* would result in higher infection prevalence, fungal loads, and population  
122 impacts.

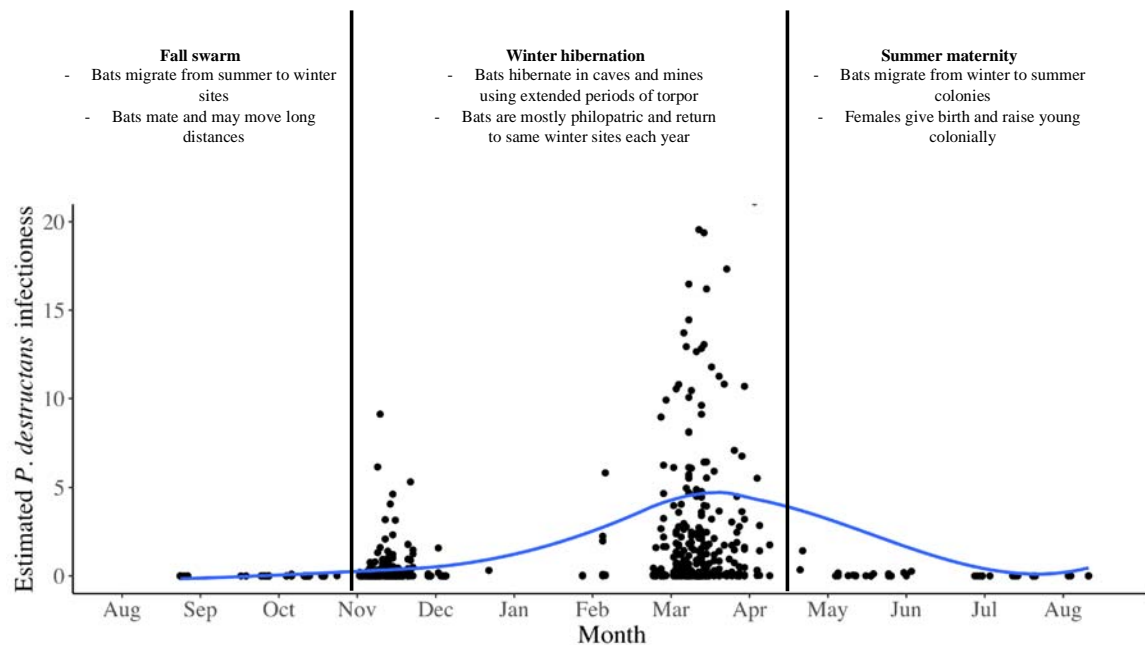

123  
124 Figure 1. Mobility, migration, and infectiousness of temperate bats infected with *P.*  
125 *destructans*. Data from (Langwig *et al.* 2015a) and (Hoyt *et al.* 2020b) from little brown,  
126 northern long-eared, big brown, and tri-colored bats. Each estimate of infectiousness is  
127 derived from the mean fungal loads of all positive individuals of a given species captured  
128 on a given date ('average fungal loads') multiplied by the fraction of individuals of that

129 species positive for *P. destructans* ('prevalence'), multiplied by the proportional  
130 abundance of the species in the sample. This estimate is commonly referred to as  
131 'propagule pressure' in invasion ecology (Lockwood, Cassey & Blackburn 2005). For  
132 example, northern long-eared bats, which are rare (typically comprising <5% of  
133 captures), but have high fungal loads and high prevalence would receive a lower estimate  
134 of infectiousness than little brown bats with equally high loads and prevalence but more  
135 commonly captured. Blue lines show loess curve smoothing to data points to ease  
136 visualization. Temperate hibernating bats are thought to have high mobility during fall  
137 swarm due to mating behavior and migration between summer and winter grounds while  
138 remaining more sedentary during winter while they hibernate (Davis & Hitchcock 1965;  
139 Thomas, Fenton & Barclay 1979; Thomas, Dorais & Bergeron 1990).

140

## 141 **2. Methods:**

### 142 **2.1 Study sites and data collection**

143 We studied patterns of *P. destructans* arrival at 22 sites in the Midwestern U.S.  
144 Over a 5-year period, we visited each site twice per winter and collected data on  
145 population dynamics and infection status of four hibernating bat species (*Myotis*  
146 *lucifugus*, *Myotis septentrionalis*, *Eptesicus fuscus*, and *Perimyotis subflavus*). We used  
147 epidermal swab sampling to determine the presence and abundance of *P. destructans* on  
148 bats at two time points during hibernation (November - early hibernation, and March -  
149 late hibernation) in each year. During each visit, we counted all bats present and  
150 identified bats to the species level. In addition, we installed HOBO U23 Pro v2

151 temperature (+/- 0.2 C accuracy) and humidity (+/- 3.5 - 5%) loggers at 1–4 locations  
152 within a site to determine roost temperature and humidity.

## 153 **2.2 Sample testing**

154 We sampled bats using a standardized protocol (Langwig *et al.* 2015a) and stored  
155 swabs in RNAlater® for sample preservation until extraction. We tested samples for *P.*  
156 *destructans* DNA using real-time PCR (Muller *et al.* 2013) and quantified fungal loads  
157 based on the cycle threshold ( $C_t$ ) value to estimate a fungal load on each bat, with a cut-  
158 off of 40 cycles. Quantification of serial dilutions of the DNA from 10 ng to 1000 fg  
159 resulted in  $C_t$  scores ranging from 17.33 to 30.74 and a quantification relationship of  $C_t =$   
160  $-3.348 * \log_{10}(P. \textit{destructans}[\text{ng}]) + 22.049$ ,  $r^2 = 0.986$ . We calculated prevalence as the  
161 proportion of bats of each species testing positive for *P. destructans* out of the number of  
162 individuals of that species sampled.

## 163 **2.3 Statistical analysis**

164 We used modified binomial power analyses to assess our ability to detect *P.*  
165 *destructans* arrival at each site where no positive samples were detected. We first  
166 calculated an expected early prevalence at each site where *P. destructans* was not  
167 detected in early hibernation based on a weighted mean prevalence. The weighted mean  
168 prevalence was calculated as the average prevalence of each species at sites where *P.*  
169 *destructans* was detected in early hibernation multiplied by the proportional abundance of  
170 a given species at each site (Table S1). We then calculated the probability of missing *P.*  
171 *destructans* at a site as the probability of getting all negatives in bats given the expected  
172 prevalence at a site multiplied by the probability of missing *P. destructans* in the  
173 unsampled bats (calculation shown in Appendix).



174 We investigated the effect of timing of *P. destructans* arrival on late winter  
175 prevalence by fitting a generalized linear mixed model with a binomial distribution and a  
176 logit link. We included fixed effects for the timing of *P. destructans* detection (early or  
177 late hibernation) interacting with the effect of species, and included site as a random  
178 effect. We also examined the effect of timing of *P. destructans* detection on fungal loads  
179 using a linear mixed model with species and timing of detection as interacting fixed  
180 effects, and site as a random effect. Lastly, we assessed the effect of the timing of *P.*  
181 *destructans* introduction on  $\log_{10}$  bat population growth rates, calculated as the annual  
182 change in late winter counts at each site, using linear mixed models with species  
183 interacting with timing of detection as fixed effects and site as a random effect. We  
184 explored the inclusion of autumn prevalence as a continuous variable (0 for all sites and  
185 species where *P. destructans* was not detected, prevalence in each species ranged  
186 between 0 and 0.25 for sites where *P. destructans* was detected during autumn) and the  
187 results were qualitatively similar to those shown, so we present the discretized (early or  
188 late winter *P. destructans* detection) for simplicity of visualization and interpretation.

189 Lastly, we investigated evidence of overwinter movements of bats among sites.  
190 At each site, we calculated our response variable, overwinter  $\lambda$ , as the proportional  
191 change in the number of bats of each species at a site by dividing the late hibernation  
192 count by the early hibernation count. We then used a linear mixed model to assess the  
193 relationship between  $\log_{10}(\text{overwinter } \lambda)$  and  $\log_{10}(\text{early hibernation colony size})$  with an  
194 additive or interactive effect of species and site as a random effect.

195

196 **3. Results:**

197           During early hibernation, we sampled 706 total bats from 22 sites in the year that  
198 *P. destructans* was first detected (site mean +/- SE = 67.4 +/- 1.79)(Table S1). We first  
199 detected *P. destructans* in early hibernation at 32% of sites (7/22), whereas in 68% of  
200 sites (15/22), the detection of *P. destructans* first occurred during our late hibernation  
201 visit (Figure 2). A total of 468 bats (site mean +/- SE = 31.1 +/- 1.25) were sampled from  
202 sites that were negative for *P. destructans* during early hibernation and became positive  
203 later in the same winter. After accounting for the relatively high proportion of bats  
204 sampled in each site (an average of 38% of the total bats at each site) and variable  
205 estimated "true" prevalence among sites (weighted mean prevalence of the species  
206 sampled from sites where *P. destructans* was detected in early hibernation: mean = 0.07,  
207 range = 0.05, 0.10), the mean probability of missing *P. destructans* at each negative site  
208 was 0.063 (median = 0.039, range: 0.005–0.3266), suggesting fairly good power to detect  
209 *P. destructans* presence.

210           Across sites where *P. destructans* was first detected during early hibernation, we  
211 were more likely to detect *P. destructans* on *M. lucifugus*, *M. septentrionalis*, and *E.*  
212 *fuscus* than on *P. subflavus* (*P. subflavus* intercept: -1.82 +/- 0.66, *M. lucifugus* coeff:  
213 1.79 +/- 0.38 P < 0.0001, *E. fuscus* coeff: 1.40 +/- 0.51, P = 0.006, *M. septentrionalis*  
214 coef: 1.44 +/- 0.39, P = 0.0002, Appendix). In sites where *P. destructans* was first  
215 detected in late hibernation, we were also less likely to detect *P. destructans* on *P.*  
216 *subflavus* than on any other species (*P. subflavus* intercept: -1.69 +/- 0.31, *M. lucifugus*  
217 coeff: 0.94 +/- 0.22 P < 0.0001, *E. fuscus* coeff: 0.66 +/- 0.30, P = 0.0264, *M.*  
218 *septentrionalis* coeff: 0.84 +/- 0.26, P = 0.0014, Appendix).

219           The timing of *P. destructans* introduction influenced disease dynamics and  
220 population impacts for some, but not all, bat species (Figure 3). For *M. septentrionalis*,  
221 prevalence of *P. destructans*, fungal loads, and population impacts during late winter  
222 were higher at sites where *P. destructans* was first detected in early hibernation (one-  
223 tailed P-values = 0.032, 0.005, 0.0004, respectively, Appendix). For *M. lucifugus*,  
224 prevalence was also higher in sites where *P. destructans* was first detected in early  
225 hibernation (one-tailed P = 0.04, Appendix), although the effect on fungal loads and  
226 population impacts was less clear (Appendix). There was no clear effect of the timing of  
227 *P. destructans* introduction on prevalence, fungal loads, or population impacts for either  
228 *E. fuscus* or *P. subflavus*, possibly because these species had lower prevalence and fungal  
229 loads than *M. septentrionalis* and *M. lucifugus* in the first year of detection (Figure 3,  
230 Appendix).

231           We found that prior to the arrival of WNS, there were detectable changes in  
232 population counts between early and late hibernation (Figure 4). Across species, as  
233 colony size decreased in early hibernation, immigration increased (early hibernation  
234 colony size coeff: -0.15 +/- 0.06, t = -2.66) such that smaller colonies had proportionally  
235 more immigrants than larger colonies, indicative of a general spreading out of bats across  
236 sites during the hibernation season. We found no support for an interactive model over an  
237 additive model ( $\Delta AIC = -9.63$ ), suggesting no clear indication that the slope of this effect  
238 differed among species. The changes in overwinter counts occurred despite frigid  
239 minimum temperatures that were consistently below 5°C throughout this period (Figure  
240 S1), suggesting that some movement among hibernacula continues to occur during winter  
241 when bats are most infected with *P. destructans*.

242 Lastly, we explored the effect of multiple covariates on the probability that *P.*  
243 *destructans* arrived at a site outside of or during the hibernation season, including abiotic  
244 (vapor pressure deficit and temperature) and biotic (abundance of certain species, species  
245 richness). We found no clear effects that any of these variables modified the probability  
246 that *P. destructans* was first detected at a site during early hibernation (Figure S2,  
247 Appendix).

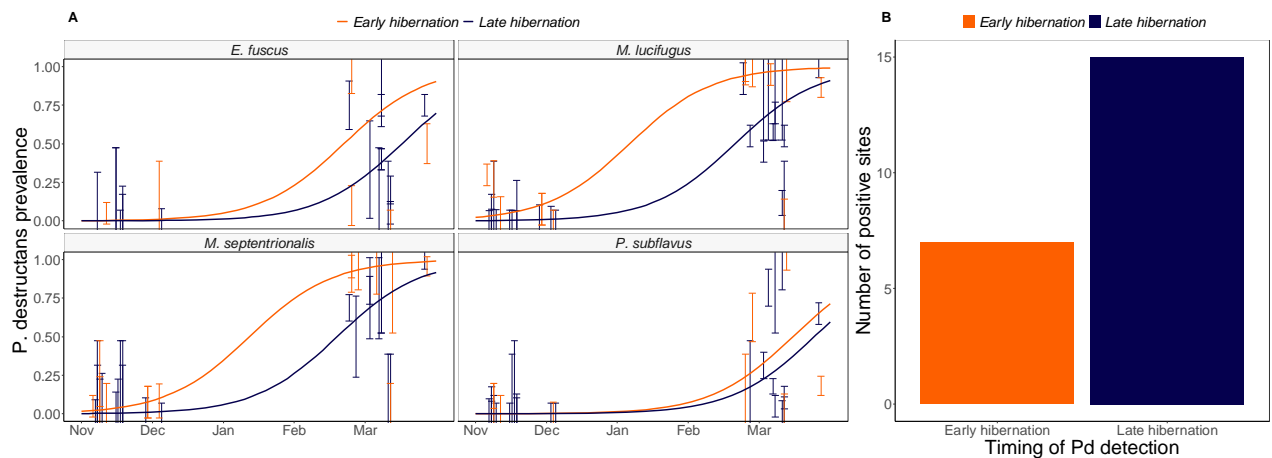

248

## 249 **Figure 2**

250 (a) Change in overwinter prevalence of *Pseudogymnoascus destructans* in the year that *P.*  
251 *destructans* was first detected at a site. Lines shows fits of a generalized linear mixed  
252 model with a binomial distribution with timing of first detection interacting with species  
253 and an additive effect of date with site as a random effect. (b) Twice as many sites had  
254 the first detection of *P. destructans* in late winter as in early winter.

255

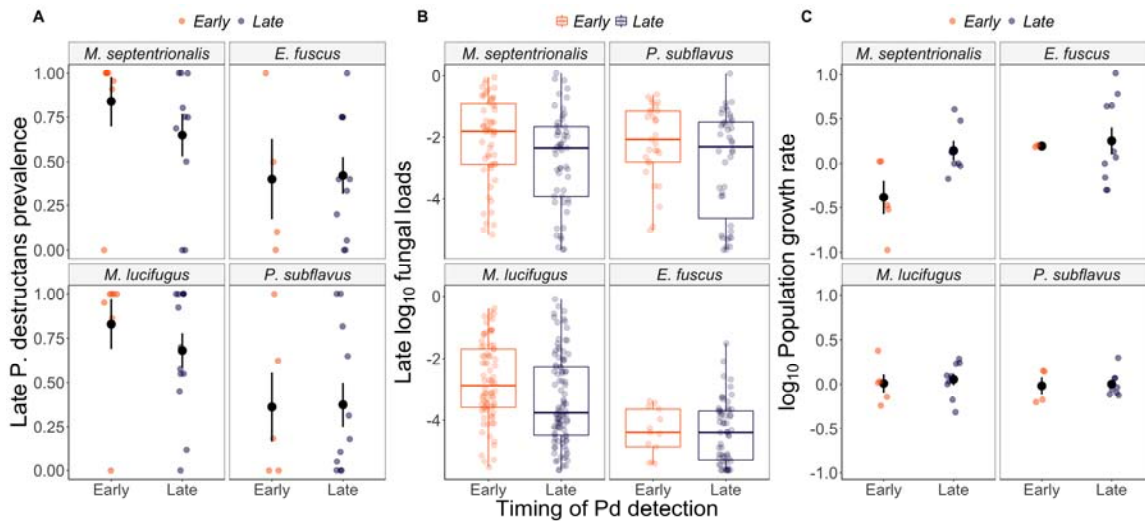

256

257 **Figure 3**

258 The timing of *Pseudogymnoascus destructans* introduction (early or late hibernation)  
259 influences late winter infection prevalence +/- SE (a), late winter fungal loads (b), and  
260 annual population impacts +/- SE (from late winter in the year that *P. destructans* arrives  
261 to the subsequent winter) (c), in some species. In sites where *P. destructans* was first  
262 detected during late hibernation *M. septentrionalis* had significantly higher infection  
263 prevalence, fungal loads, and population impacts by the end of winter in the first year of  
264 WNS.

265

266

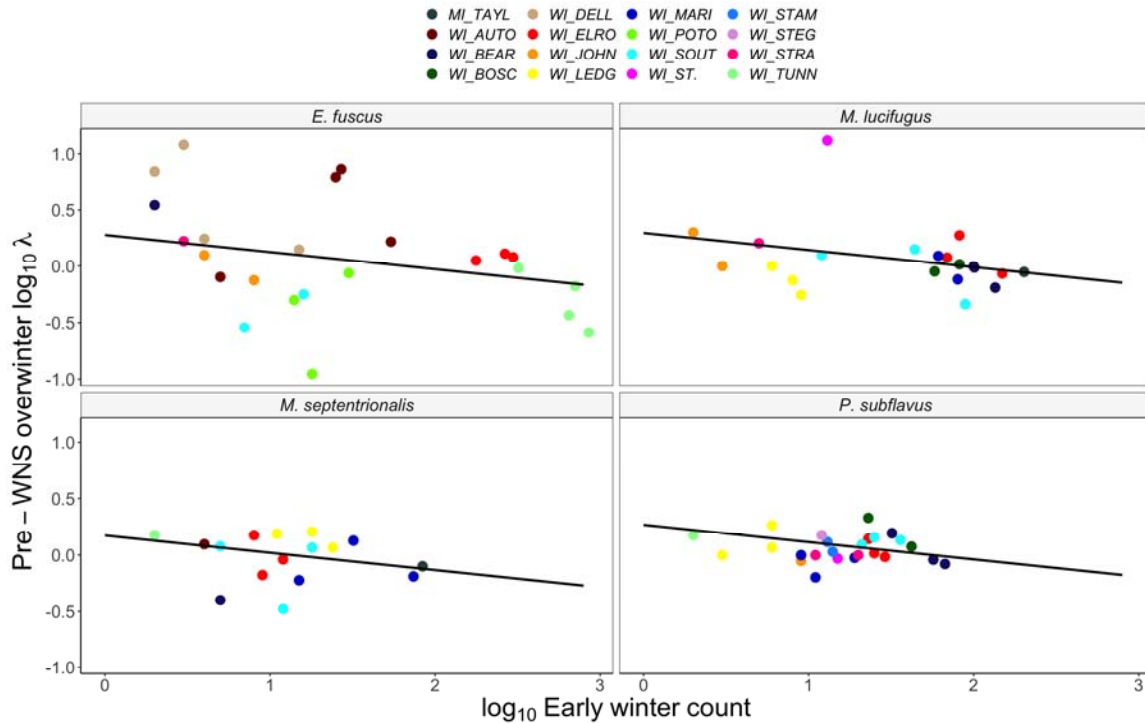

267

268 **Figure 4**

269 Pre-WNS immigration rates show dynamic populations during winter. Panels show bat  
270 species and colors indicate different bat populations. Lines show the fitted relationship  
271 between  $\log_{10}$  early winter counts of bats and the rate of change in the same population  
272 over winter. Despite cold ( $<5^{\circ}\text{C}$ ) temperatures, there was considerable immigration and  
273 emigration among hibernation sites, consistent with bats moving from larger to smaller  
274 colonies over winter.

275

276 **4. Discussion:**

277 Our results indicate that host fungal burdens were important in determining the  
278 timing of pathogen spread. We found that *P. destructans* was more likely to be  
279 introduced to sites during winter hibernation than during autumn, suggesting that elevated  
280 infectiousness overwinter outweighed the increase in activity and long-distance

281 movements that occur during autumn. Bats were previously thought to be restricted in  
282 their movement among sites during hibernation due to extremely cold temperatures (< -  
283 5C; Fig S1) and a lack of prey availability. However, we found evidence that limited  
284 movement may be occurring among hibernacula during the winter, and given their  
285 increased levels fungal loads and prevalence, provide a higher probability of successful  
286 invasion to new sites. The lower fungal loads and prevalence on bats during autumn  
287 when they are highly mobile has likely decreased the rate of geographic expansion of the  
288 fungus as the majority of spread occurs during the hibernation period. As *P. destructans*  
289 moves into less connected western bat populations (Wilder, Kunz & Sorenson 2015;  
290 Lorch *et al.* 2016), spread could be further dampened by larger distances among colonies  
291 (Wilder, Kunz & Sorenson 2015; Weller *et al.* 2018).

292         Although the absolute absence of a pathogen is difficult to confirm, large sample  
293 sizes paired with the differential consequences of the timing of *P. destructans*  
294 introduction on disease dynamics, suggest that we did not simply fail to detect *P.*  
295 *destructans* during early winter. Our results also demonstrate that the timing of *P.*  
296 *destructans* introduction was more important for some species than others. Early  
297 introduction of *P. destructans* resulted in higher mortality in *M. septentrionalis*  
298 populations, but not *M. lucifugus*. Previous laboratory studies have shown that infection  
299 duration prior to death was 90-120 days for *M. lucifugus*. The absence of clear mortality  
300 in *M. lucifugus* populations while *M. septentrionalis* suffered from higher impacts  
301 suggests that *M. septentrionalis* may have a shorter time from infection until death.

302 Infection in *P. subflavus* and *E. fuscus* were lower in the first year of WNS than *M. spp.*,  
303 likely due to low environmental contamination (Langwig *et al.* 2015b; Hoyt *et al.* 2020a)  
304 and fewer contacts over the hibernation period (Hoyt *et al.* 2018).

305 We found evidence of some overwinter movement among hibernacula prior to  
306 the arrival of WNS, with a general trend of bats spreading out from larger to smaller  
307 colony size sites. Other studies have found that some species (especially the larger *E.*  
308 *fuscus*) can move in very cold temperatures (Klüg-Baerwald *et al.* 2016), although winter  
309 flight of *Myotis* spp. is thought to be a relatively rare occurrence (Davis & Hitchcock  
310 1965). We cannot exclude the possibility that bats in larger sites became more difficult to  
311 detect in late winter while bats in smaller sites became more apparent. However, sites  
312 were selected for inclusion in this study for their relative simplicity in searching and  
313 ability to census all bats present (e.g. they did not have sections that we were unable to  
314 access and many were square tunnels with no obvious hiding places). As a result, we  
315 think that failed detections are unlikely to fully explain this relationship. In addition,  
316 higher overwinter mortality is unlikely to be a potential explanation as there is no  
317 evidence to suggest elevated mortality in sites with larger population sizes prior to the  
318 arrival of WNS (Langwig *et al.* 2012). Interestingly, symptoms of WNS include mid-  
319 hibernation emergence onto the winter landscape (Carr, Bernard & Stiver 2014; Bernard  
320 & McCracken 2017). This sickness behavior may increase movements between  
321 hibernacula and the spread of *P. destructans*.

322 We found no clear effects of any covariate in explaining differences in timing of  
323 arrival. However, we environmental conditions of hibernacula may be important  
324 determinants of *P. destructans* establishment into new communities outside of the



325 hibernation season, as is suggested by the directionality and magnitude of a trend where  
326 warmer and wetter hibernacula tended to have a higher probability of autumn  
327 introduction. While bats with low fungal loads are likely moving among uninfected  
328 hibernacula during autumn, vapor pressure deficit and potentially temperature appear to  
329 be important in determining whether *P. destructans* can successfully establish in a  
330 population (Lilley, Anttila & Ruokolainen 2018). Given the limited number of sites  
331 where *P. destructans* arrived outside of the hibernation season, it was difficult to  
332 ascertain the importance of a number of factors that have been implicated by other studies  
333 (Wilder *et al.* 2011; Maher *et al.* 2012; Wilder, Kunz & Sorenson 2015). For example,  
334 species-specific differences in sociality and transmission (Hoyt *et al.* 2018) may be  
335 important in determining whether a lightly infected bat could introduce *P. destructans*  
336 during fall, although we found no clear effects of species abundance or composition on  
337 the timing of first detection of *P. destructans*. Additional research is needed to determine  
338 which species and site-specific differences may influence the timing of pathogen spread.

339       Importantly, many studies rely on disease stage (e.g. invading, epidemic or  
340 endemic) to draw inferences about geographic disease risk, population declines, and  
341 community persistence. Given the high probability of *P. destructans* introduction to new  
342 sites during winter, early and midwinter surveys could miss the introduction of *P.*  
343 *destructans*, and thus falsely conclude pathogen absence during the first year of arrival.  
344 Our results suggest that the arrival time of *P. destructans* can substantially influence  
345 dynamics, and therefore could be responsible for unexplained variance in transmission,  
346 impacts, and structure of remnant populations when sites are grouped by disease stage.

347 Our ability to predict the timing and patterns of pathogen spread are fundamental  
348 to the prevention and control of infectious disease outbreaks. The differential timing of  
349 initial pathogen arrival can have important effects on disease dynamics and lasting  
350 impacts to populations. This study suggests that host infectiousness is an important factor  
351 in determining successful pathogen spread and that incorrectly attributing pathogen  
352 spread to periods of high mobility would have masked the true underlying causes of  
353 among site variation in transmission and population impacts. Future studies examining  
354 the spatial and seasonal patterns of pathogen movement should consider the multitude of  
355 factors that might influence spread patterns.

356

357 Acknowledgements: We thank Steffany Yamada, MI DNR, Eric McMaster and the many  
358 landowners for site access. The research was funded by NSF grants DEB-1115895, DEB-  
359 1336290, DEB-1911853 and the USFWS (F17AP00591). The authors have no competing  
360 interests to declare.

361

362 Author Contributions: KEL analyzed the data and wrote the original draft; KEL, AMK  
363 and JRH revised the manuscript with input from all authors; KLP and JTF tested the  
364 samples and KEL, JPW, HMK, JAR, JED, WHS, AMK, and JRH collected the data.

365

366 Data Availability Statement:

367 Data will archived at VTData Repository upon manuscript acceptance or reviewer  
368 request.

369

370 References:

- 371 Altizer, S., Bartel, R. & Han, B.A. (2011) Animal Migration and Infectious Disease Risk.  
372 *Science*, **331**, 296-302.
- 373 Altizer, S., Dobson, A., Hosseini, P., Hudson, P., Pascual, M. & Rohani, P. (2006)  
374 Seasonality and the dynamics of infectious diseases. *Ecology Letters*, **9**, 467-484.
- 375 Arnold, B.D. (2007) Population structure and sex-biased dispersal in the forest dwelling  
376 vespertilionid bat, *Myotis septentrionalis*. *The American Midland Naturalist*, **157**,  
377 374-384.
- 378 Bernard, R.F. & McCracken, G.F. (2017) Winter behavior of bats and the progression of  
379 white-nose syndrome in the southeastern United States. *Ecology and Evolution*, **7**,  
380 1487-1496.
- 381 Bouwman, K.M. & Hawley, D.M. (2010) Sickness behaviour acting as an evolutionary  
382 trap? Male house finches preferentially feed near diseased conspecifics. *Biology*  
383 *Letters*, **6**, 462-465.
- 384 Caceres, M.C. & Barclay, R.M.R. (2000) *Myotis septentrionalis*. *Mammalian Species*, 1-  
385 4.
- 386 Carr, J.A., Bernard, R.F. & Stiver, W.H. (2014) Unusual bat behavior during winter in  
387 Great Smoky Mountains National Park. *Southeastern naturalist*, **13**, N18-N21.
- 388 Conner, M.M. & Miller, M.W. (2004) Movement patterns and spatial epidemiology of a  
389 prion disease in mule deer population units. *Ecological Applications*, **14**, 1870-  
390 1881.
- 391 Cope, J.B. & Humphrey, S.R. (1977) SPRING AND AUTUMN SWARMING  
392 BEHAVIOR IN INDIANA BAT, MYOTIS-SODALIS. *Journal of Mammalogy*,  
393 **58**, 93-95.
- 394 Dalziel, B.D., Kissler, S., Gog, J.R., Viboud, C., Bjørnstad, O.N., Metcalf, C.J.E. &  
395 Grenfell, B.T. (2018) Urbanization and humidity shape the intensity of influenza  
396 epidemics in US cities. *Science*, **362**, 75-79.
- 397 Dalziel, B.D., Pourbohloul, B. & Ellner, S.P. (2013) Human mobility patterns predict  
398 divergent epidemic dynamics among cities. *Proceedings of the Royal Society B:*  
399 *Biological Sciences*, **280**, 20130763.
- 400 Davis, W. (1970) Hibernation: ecology and physiological ecology. *Biology of Bats*, **1**,  
401 265 - 300.
- 402 Davis, W.H. & Hitchcock, H.B. (1965) Biology and migration of the bat, *Myotis*  
403 *lucifugus*, in New England. *Journal of Mammalogy*, **46**, 296-313.
- 404 Fenton, M.B. & Barclay, R.M.R. (1980) *Myotis lucifugus*. *Mammalian Species*, 1-8.
- 405 Frick, W.F., Pollock, J.F., Hicks, A.C., Langwig, K.E., Reynolds, D.S., Turner, G.G.,  
406 Butchkoski, C.M. & Kunz, T.H. (2010) An emerging disease causes regional  
407 population collapse of a common north american bat species. *Science*, **329**, 679-  
408 682.
- 409 Frick, W.F., Puechmaille, S.J., Hoyt, J.R., Nickel, B.A., Langwig, K.E., Foster, J.T.,  
410 Barlow, K.E., Bartonička, T., Feller, D., Haarsma, A.J., Herzog, C., Horacek, I.,  
411 van der Kooij, J., Mulken, B., Petrov, B., Reynolds, R., Rodrigues, L., Stihler,  
412 C.W., Turner, G.G. & Kilpatrick, A.M. (2015) Disease alters macroecological  
413 patterns of North American bats. *Global Ecology and Biogeography*, **24**, 741-749.
- 414 Fujita, M.S. & Kunz, T.H. (1984) *Pipistrellus subflavus*. *Mammalian Species*, 1-6.

- 415 Glover, A.M. & Altringham, J.D. (2008) Cave selection and use by swarming bat species.  
416 *Biological Conservation*, **141**, 1493-1504.
- 417 Hoyt, J.R., Langwig, K.E., Sun, K., Parise, K.L., Li, A., Wang, Y., Huang, X., Worledge,  
418 L., Miller, H. & White, J.P. (2020a) Environmental reservoir dynamics predict  
419 global infection patterns and population impacts for the fungal disease white-nose  
420 syndrome. *Proceedings of the National Academy of Sciences*, **117**, 7255-7262.
- 421 Hoyt, J.R., Langwig, K.E., Sun, K., Parise, K.L., Li, A., Wang, Y., Huang, X., Worledge,  
422 L., Miller, H., White, J.P., Kaarakka, H.M., Redell, J.A., Görföl, T., Boldogh,  
423 S.A., Fukui, D., Sakuyama, M., Yachimori, S., Sato, A., Dalannast, M.,  
424 Jargalsaikhan, A., Batbayar, N., Yovel, Y., Amichai, E., Natradze, I., Frick, W.F.,  
425 Foster, J.T., Feng, J. & Kilpatrick, A.M. (2020b) Environmental reservoir  
426 dynamics predict global infection patterns and population impacts for the fungal  
427 disease white-nose syndrome. *Proceedings of the National Academy of Sciences*,  
428 **117**, 7255.
- 429 Hoyt, J.R., Langwig, K.E., White, J.P., Kaarakka, H., Redell, J., Kurta, A., DePue, J.,  
430 Scullon, W.H., Parise, K.L., Foster, J.T., Frick, W.F. & Kilpatrick, A.M. (2018)  
431 Cryptic connections illuminate pathogen transmission within community  
432 networks. *Nature*.
- 433 Kiesecker, J.M., Skelly, D.K., Beard, K.H. & Preisser, E. (1999) Behavioral reduction of  
434 infection risk. *Proceedings of the National Academy of Sciences of the United  
435 States of America*, **96**, 9165-9168.
- 436 Kilpatrick, A.M., Chmura, A.A., Gibbons, D.W., Fleischer, R.C., Marra, P.P. & Daszak,  
437 P. (2006) Predicting the global spread of H5N1 avian influenza. *Proceedings of  
438 the National Academy of Sciences of the United States of America*, **103**, 19368-  
439 19373.
- 440 Kilpatrick, A.M., LaDeau, S.L. & Marra, P.P. (2007) Ecology of west nile virus  
441 transmission and its impact on birds in the western hemisphere. *Auk*, **124**, 1121-  
442 1136.
- 443 Klüg-Baerwald, B.J., Gower, L.E., Lausen, C. & Brigham, R. (2016) Environmental  
444 correlates and energetics of winter flight by bats in Southern Alberta, Canada.  
445 *Canadian Journal of Zoology*, **94**, 829-836.
- 446 Langwig, K.E., Frick, W.F., Bried, J.T., Hicks, A.C., Kunz, T.H. & Marm Kilpatrick, A.  
447 (2012) Sociality, density-dependence and microclimates determine the persistence  
448 of populations suffering from a novel fungal disease, white-nose syndrome.  
449 *Ecology Letters*, **15**, 1050-1057.
- 450 Langwig, K.E., Frick, W.F., Hoyt, J.R., Parise, K.L., Drees, K.P., Kunz, T.H., Foster, J.T.  
451 & Kilpatrick, A.M. (2016) Drivers of variation in species impacts for a multi-host  
452 fungal disease of bats. *Phil. Trans. R. Soc. B*, **371**, 20150456.
- 453 Langwig, K.E., Frick, W.F., Reynolds, R., Parise, K.L., Drees, K.P., Hoyt, J.R., Cheng,  
454 T.L., Kunz, T.H., Foster, J.T. & Kilpatrick, A.M. (2015a) Host and pathogen  
455 ecology drive the seasonal dynamics of a fungal disease, white-nose syndrome.  
456 *Proceedings of the Royal Society B: Biological Sciences*, **282**.
- 457 Langwig, K.E., Hoyt, J.R., Parise, K.L., Kath, J., Kirk, D., Frick, W.F., Foster, J.T. &  
458 Kilpatrick, A.M. (2015b) Invasion dynamics of white-nose syndrome white-nose  
459 syndrome fungus, midwestern United States, 2012-2014. *Emerg Infect Dis*, **21**.

- 460 Lilley, T.M., Anttila, J. & Ruokolainen, L. (2018) Landscape structure and ecology  
461 influence the spread of a bat fungal disease. *Functional Ecology*, **32**, 2483-2496.
- 462 Lockwood, J.L., Cassey, P. & Blackburn, T. (2005) The role of propagule pressure in  
463 explaining species invasions. *Trends in Ecology & Evolution*, **20**, 223-228.
- 464 Lorch, J.M., Meteyer, C.U., Behr, M.J., Boyles, J.G., Cryan, P.M., Hicks, A.C.,  
465 Ballmann, A.E., Coleman, J.T.H., Redell, D.N., Reeder, D.M. & Blehert, D.S.  
466 (2011) Experimental infection of bats with *Geomyces destructans* causes white-  
467 nose syndrome. *Nature*, **480**, 376-378.
- 468 Lorch, J.M., Palmer, J.M., Lindner, D.L., Ballmann, A.E., George, K.G., Griffin, K.,  
469 Knowles, S., Huckabee, J.R., Haman, K.H., Anderson, C.D., Becker, P.A.,  
470 Buchanan, J.B., Foster, J.T. & Blehert, D.S. (2016) First Detection of Bat White-  
471 Nose Syndrome in Western North America. *mSphere*, **1**, e00148-00116.
- 472 Maher, S.P., Kramer, A.M., Pulliam, J.T., Zokan, M.A., Bowden, S.E., Barton, H.D.,  
473 Magori, K. & Drake, J.M. (2012) Spread of white-nose syndrome on a network  
474 regulated by geography and climate. *Nature Communications*, **3**.
- 475 Meteyer, C.U., Buckles, E.L., Blehert, D.S., Hicks, A.C., Green, D.E., Shearn-Bochsler,  
476 V., Thomas, N.J., Gargas, A. & Behr, M.J. (2009) Histopathologic criteria to  
477 confirm white-nose syndrome in bats. *Journal of Veterinary Diagnostic*  
478 *Investigation*, **21**, 411-414.
- 479 Muller, L.K., Lorch, J.M., Lindner, D.L., O'Connor, M., Gargas, A. & Blehert, D.S.  
480 (2013) Bat white-nose syndrome: a real-time TaqMan polymerase chain reaction  
481 test targeting the intergenic spacer region of *Geomyces destructans*. *Mycologia*,  
482 **105**, 253-259.
- 483 Norris, K. & Evans, M.R. (2000) Ecological immunology: life history trade-offs and  
484 immune defense in birds. *Behavioral Ecology*, **11**, 19-26.
- 485 Reeder, D.M., Frank, C.L., Turner, G.G., Meteyer, C.U., Kurta, A., Britzke, E.R.,  
486 Vodzak, M.E., Darling, S.R., Stihler, C.W., Hicks, A.C., Jacob, R., Grieneisen,  
487 L.E., Brownlee, S.A., Muller, L.K. & Blehert, D.S. (2012) Frequent Arousal from  
488 Hibernation Linked to Severity of Infection and Mortality in Bats with White-  
489 Nose Syndrome. *Plos One*, **7**.
- 490 Rossiter, S.J., Zubaid, A., MOHD-ADNAN, A., Struebig, M.J., Kunz, T.H., Gopal, S.,  
491 Petit, E.J. & Kingston, T. (2012) Social organization and genetic structure:  
492 insights from codistributed bat populations. *Molecular Ecology*, **21**, 647-661.
- 493 Shakhar, K. & Shakhar, G. (2015) Why Do We Feel Sick When Infected—Can Altruism  
494 Play a Role? *Plos Biology*, **13**, e1002276.
- 495 Thomas, D., Dorais, M. & Bergeron, J. (1990) Winter energy budgets and cost of  
496 arousals for hibernating little brown bats, *Myotis lucifugus*. *J Mammal*, **71**, 475 -  
497 479.
- 498 Thomas, D.W., Fenton, M.B. & Barclay, R.M.R. (1979) Social behavior of the Little  
499 brown bat, *Myotis lucifugus*. I. mating behavior. *Behavioral Ecology and*  
500 *Sociobiology*, **6**, 129-136.
- 501 Van Gils, J.A., Munster, V.J., Radersma, R., Liefhebber, D., Fouchier, R.A. & Klaassen,  
502 M. (2007) Hampered foraging and migratory performance in swans infected with  
503 low-pathogenic avian influenza A virus. *Plos One*, **2**, e184.

- 504 Veith, M., Beer, N., Kiefer, A., Johannesen, J. & Seitz, A. (2004) The role of swarming  
505 sites for maintaining gene flow in the brown long-eared bat (*Plecotus auritus*).  
506 *Heredity*, **93**, 342.
- 507 Verant, M.L., Boyles, J.G., Waldrep, W., Wibbelt, G. & Blehert, D.S. (2012)  
508 Temperature-dependent growth of *Geomyces destructans*, the fungus that causes  
509 bat white-nose syndrome. *Plos One*, **7**.
- 510 Verant, M.L., Carol, M.U., Speakman, J.R., Cryan, P.M., Lorch, J.M. & Blehert, D.S.  
511 (2014) White-nose syndrome initiates a cascade of physiologic disturbances in the  
512 hibernating bat host. *BMC physiology*, **14**, 10.
- 513 Warnecke, L., Turner, J.M., Bollinger, T.K., Lorch, J.M., Misra, V., Cryan, P.M.,  
514 Wibbelt, G., Blehert, D.S. & Willis, C.K.R. (2012) Inoculation of bats with  
515 European *Geomyces destructans* supports the novel pathogen hypothesis for the  
516 origin of white-nose syndrome. *Proceedings of the National Academy of Sciences*  
517 *of the United States of America*, **109**, 6999-7003.
- 518 Warnecke, L., Turner, J.M., Bollinger, T.K., Misra, V., Cryan, P.M., Blehert, D.S.,  
519 Wibbelt, G. & Willis, C.K.R. (2013) Pathophysiology of white-nose syndrome in  
520 bats: a mechanistic model linking wing damage to mortality. *Biology Letters*, **9**.
- 521 Weller, T.J., Rodhouse, T.J., Neubaum, D.J., Ormsbee, P.C., Dixon, R.D., Popp, D.L.,  
522 Williams, J.A., Osborn, S.D., Rogers, B.W. & Beard, L.O. (2018) A review of bat  
523 hibernacula across the western United States: Implications for white-nose  
524 syndrome surveillance and management. *Plos One*, **13**.
- 525 Wendland, L.D., Wooding, J., White, C.L., Demcovitz, D., Littell, R., Berish, J.D.,  
526 Ozgul, A., Oli, M.K., Klein, P.A., Christman, M.C. & Brown, M.B. (2010) Social  
527 behavior drives the dynamics of respiratory disease in threatened tortoises.  
528 *Ecology*, **91**, 1257-1262.
- 529 Wilder, A.P., Frick, W.F., Langwig, K.E. & Kunz, T.H. (2011) Risk factors associated  
530 with mortality from white-nose syndrome among hibernating bat colonies.  
531 *Biology Letters*, **7**, 950-953.
- 532 Wilder, A.P., Kunz, T.H. & Sorenson, M.D. (2015) Population genetic structure of a  
533 common host predicts the spread of white-nose syndrome, an emerging infectious  
534 disease in bats. *Molecular Ecology*, **24**, 5495-5506.
- 535
